# Supplementary material
Source: publisher figshare collection journal article supplement (https://rs.figshare.com/ndownloader/files/18107330)
Supplement: Supplementary file 1 [file 18107330]

## Sheet: Sheet1
Gestational Day	5th Percentile PV	50th Percentile PV	95th Percentile PV
98	73.9956	86.2483	97.9444
105	83.2816	95.9818	109.928
112	93.0565	107.133	122.726
119	104.112	119.662	136.915
126	115.52	132.624	151.973
133	128.345	146.596	168.305
140	141.365	161.576	185.458
147	155.477	177.54	203.743
154	170.02	194.156	223.063
161	185.102	211.458	242.81
168	200.796	229.461	263.278
175	216.899	247.701	284.443
182	233.261	266.705	306.075
189	249.77	285.845	327.808
196	266.342	305.03	349.727
203	282.727	324.191	371.561
210	298.913	343.277	393.103
217	314.727	361.936	414.346
224	330.191	380.194	435.145
231	344.886	397.654	455.124
238	359.037	414.401	474.365
245	372.166	430.253	492.577
252	384.518	445.067	509.642
259	395.816	458.615	525.466
266	406.06	470.927	540.079
273	415.144	481.928	553.209
280	423.085	491.352	564.917
